# Supplementary material
Source: HighWire-hosted journal article supplement (https://erj.ersjournals.com/content/61/1/2200507)

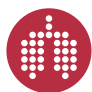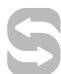

SHAREABLE PDF

# Sensitisation to recombinant *Aspergillus fumigatus* allergens and clinical outcomes in COPD

Pei Yee Tiew<sup>1</sup>, Jayanth Kumar Narayana <sup>2</sup>, Marilyn Swie Li Quek<sup>3</sup>, Yan Ying Ang<sup>3</sup>, Fanny Wai San Ko <sup>4</sup>,  
Mau Ern Poh<sup>5</sup>, Tavleen Kaur Jaggi<sup>2</sup>, Huiying Xu<sup>6</sup>, Kai Xian Thng<sup>2</sup>, Mariko Siyue Koh <sup>1</sup>, Augustine Tee<sup>7</sup>,  
David Shu Cheong Hui<sup>4</sup>, John Arputhan Abisheganaden<sup>2,6</sup>, Krasimira Tsaneva-Atanasova <sup>8,9</sup>,  
Fook Tim Chew <sup>3</sup> and Sanjay H. Chotirmall <sup>2,6</sup>

<sup>1</sup>Dept of Respiratory and Critical Care Medicine, Singapore General Hospital, Singapore. <sup>2</sup>Lee Kong Chian School of Medicine, Nanyang Technological University, Singapore. <sup>3</sup>Dept of Biological Sciences, National University of Singapore, Singapore. <sup>4</sup>Dept of Medicine and Therapeutics, The Chinese University of Hong Kong, Hong Kong. <sup>5</sup>Dept of Medicine, University of Malaya, Kuala Lumpur, Malaysia. <sup>6</sup>Dept of Respiratory and Critical Care Medicine, Tan Tock Seng Hospital, Singapore. <sup>7</sup>Dept of Respiratory and Critical Care Medicine, Changi General Hospital, Singapore. <sup>8</sup>Living Systems Institute and Department of Mathematics, College of Engineering, Mathematics and Physical Sciences, University of Exeter, Exeter, UK. <sup>9</sup>EPSRC Hub for Quantitative Modelling in Healthcare, University of Exeter, Exeter, UK.

Corresponding author: Sanjay H. Chotirmall ([schotirmall@ntu.edu.sg](mailto:schotirmall@ntu.edu.sg))

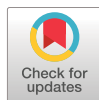

Shareable abstract (@ERSpublications)

**Sensitisation to recombinant *Aspergillus fumigatus* allergens rAsp f 1, 3, 5 and 6 in COPD identifies a patient group with poor clinical outcomes missed by assessing for sensitisation to crude *Aspergillus fumigatus* allergens alone** <https://bit.ly/3zbZuFX>

**Cite this article as:** Tiew PY, Narayana JK, Quek MSL, *et al.* Sensitisation to recombinant *Aspergillus fumigatus* allergens and clinical outcomes in COPD. *Eur Respir J* 2023; 61: 2200507 [DOI: 10.1183/13993003.00507-2022].

This single-page version can be shared freely online.

Copyright ©The authors 2023.

This version is distributed under the terms of the Creative Commons Attribution Non-Commercial Licence 4.0. For commercial reproduction rights and permissions contact [permissions@ersnet.org](mailto:permissions@ersnet.org)

This article has an editorial commentary:  
<https://doi.org/10.1183/13993003.02042-2022>

Received: 9 March 2022  
Accepted: 24 July 2022

## Abstract

**Background** Variable clinical outcomes are reported with fungal sensitisation in chronic obstructive pulmonary disease (COPD), and it remains unclear which fungi and what allergens associate with the poorest outcomes. The use of recombinant as opposed to crude allergens for such assessment is unknown.

**Methods** A prospective multicentre assessment of stable COPD (n=614) was undertaken in five hospitals across three countries: Singapore, Malaysia and Hong Kong. Clinical and serological assessment was performed against a panel of 35 fungal allergens including crude and recombinant *Aspergillus* and non-*Aspergillus* allergens. Unsupervised clustering and topological data analysis (TDA) approaches were employed using the measured sensitisation responses to elucidate if sensitisation subgroups exist and their related clinical outcomes.

**Results** *Aspergillus fumigatus* sensitisation was associated with increased exacerbations in COPD. Unsupervised cluster analyses revealed two “fungal sensitisation” groups. The first was characterised by *Aspergillus* sensitisation and increased exacerbations, poorer lung function and worse prognosis. Polysensitisation in this group conferred even poorer outcome. The second group, characterised by *Cladosporium* sensitisation, was more symptomatic. Significant numbers of individuals demonstrated sensitisation responses to only recombinant (as opposed to crude) *A. fumigatus* allergens f 1, 3, 5 and 6, and exhibited increased exacerbations, poorer lung function and an overall worse prognosis. TDA validated these findings and additionally identified a subgroup within *Aspergillus*-sensitised COPD of patients with frequent exacerbations.

**Conclusion** *Aspergillus* sensitisation is a treatable trait in COPD. Measuring sensitisation responses to recombinant *Aspergillus* allergens identifies an important patient subgroup with poor COPD outcomes that remains overlooked by assessment of only crude *Aspergillus* allergens.

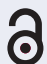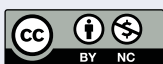

Supplement: inline-supplementary-material-2 [file inline-supplementary-material-2.pdf]
